RESEARCH ARTICLE

# Mental, physical, and social well-being and quality of life in healthy young adult twin pairs discordant and concordant for body mass index

Sakris K. E. Kupila<sup>1\*</sup>, Bram J. Berntzen<sup>1,2</sup>, Maheswary Muniandy<sup>1</sup>, Aila J. Ahola<sup>1,3,4</sup>, Jaakko Kaprio<sup>2</sup>, Aila Rissanen<sup>1</sup>, Kirsi H. Pietiläinen<sup>1,5</sup>

**1** Obesity Research Unit, Research Program for Clinical and Molecular Metabolism, Faculty of Medicine, University of Helsinki, Helsinki, Finland, **2** Institute for Molecular Medicine Finland (FIMM), HiLIFE, University of Helsinki, Helsinki, Finland, **3** Folkhälsan Research Centre, Folkhälsan Institute of Genetics, Helsinki, Finland, **4** Abdominal Centre Nephrology, University of Helsinki and Helsinki University Central Hospital, Helsinki, Finland, **5** Obesity Centre, Endocrinology, Abdominal Centre, Helsinki University Hospital and University of Helsinki, Helsinki, Finland

\* [sakris.kupila@helsinki.fi](mailto:sakris.kupila@helsinki.fi)

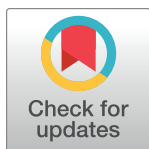

## OPEN ACCESS

**Citation:** Kupila SKE, Berntzen BJ, Muniandy M, Ahola AJ, Kaprio J, Rissanen A, et al. (2023) Mental, physical, and social well-being and quality of life in healthy young adult twin pairs discordant and concordant for body mass index. PLoS ONE 18(12): e0294162. <https://doi.org/10.1371/journal.pone.0294162>

**Editor:** Qin Xiang Ng, Singapore General Hospital, SINGAPORE

**Received:** December 12, 2022

**Accepted:** October 13, 2023

**Published:** December 6, 2023

**Copyright:** © 2023 Kupila et al. This is an open access article distributed under the terms of the [Creative Commons Attribution License](https://creativecommons.org/licenses/by/4.0/), which permits unrestricted use, distribution, and reproduction in any medium, provided the original author and source are credited.

**Data Availability Statement:** Data are part of the "Twin Study" and are deposited with the Biobank of the Finnish Institute for Health and Welfare (<https://thl.fi/en/web/thl-biobank-for-researchers/sample-collections/twin-study>). For details on accessing the data, see <https://thl.fi/en/web/thl-biobank-for-researchers/application-process>. All bona fide researchers can apply for the data.

**Funding:** The study was supported by grants from the Academy of Finland (grant numbers 272376,

## Abstract

### Objective

The relationship between obesity and mental health is complex and is moderated by the level of obesity, age, sex, and social and genetic factors. In the current study, we used a unique co-twin control design, with twin pairs discordant for body mass index (BMI), to control for shared genetic and environmental effects between obesity and several dimensions of mental health.

### Methods

We studied 74 monozygotic (MZ) twin pairs, of whom 36 were BMI-discordant (intra-pair difference in BMI  $\geq 3$  kg/m<sup>2</sup>), and 77 dizygotic (DZ) twin pairs (46 BMI-discordant). We assessed subjective health, especially mental health and mental well-being (depression, anxiety, self-esteem, health-related quality of life, life satisfaction, and social well-being) through questionnaires.

### Results

Heavier MZ co-twins from BMI-discordant pairs had poorer general health ( $58.8 \pm 3.0$  vs.  $72.4 \pm 3.8$ ,  $P = 0.001$ , FDR = 0.017 on a scale from 0 to 100 where higher scores indicate more positive results), physical functioning ( $90.3 \pm 1.1$  vs.  $95.5 \pm 2.2$ ,  $P = 0.024$ , FDR = 0.122), energy levels ( $55.6 \pm 3.4$  vs.  $66.6 \pm 3.3$ ,  $P = 0.013$ , FDR = 0.109), and emotional well-being ( $65.9 \pm 3.2$  vs.  $75.4 \pm 2.9$ ,  $P = 0.031$ , FDR = 0.122), as well as a tendency for depressive symptoms ( $8.4 \pm 1.3$  vs.  $5.6 \pm 0.9$ ,  $P = 0.071$ , FDR = 0.166) compared to their leaner co-twins. Heavier DZ co-twins had poorer total physical well-being ( $91.6 \pm 1.9$  vs.  $95.6 \pm 1.0$ ,  $P = 0.035$ , FDR = 0.356) and more depressive symptoms ( $4.3 \pm 0.9$  vs.  $2.4 \pm 0.5$ ,  $P = 0.016$ , FDR = 0.345).

266286, 314383, 335443; [www.aka.fi/](http://www.aka.fi/)), Finnish Medical Foundation ([www.laaketieteensaatio.fi/](http://www.laaketieteensaatio.fi/)), Gyllenberg Foundation ([www.gyllenbergs.fi/](http://www.gyllenbergs.fi/)), Novo Nordisk Foundation (grant numbers NNF100C1013354, NNF170C0027232, NNF200C0060547; [www.novonordiskfonden.dk/](http://www.novonordiskfonden.dk/)), Finnish Diabetes Research Foundation ([www.diabetestutkimus.fi/](http://www.diabetestutkimus.fi/)), Finnish Foundation for Cardiovascular Research ([www.sydantutkimussaatio.fi/](http://www.sydantutkimussaatio.fi/)), University of Helsinki, Helsinki University Hospital and Government Research Funds ([www.hus.fi/](http://www.hus.fi/)) received by KHP, and Academy of Finland - Centre of Excellence in Complex Disease Genetics (grant numbers: 129680 and 213506), National Institute of Alcohol Abuse and Alcoholism (grant numbers: AA-09203 and AA-12502; [www.niaaa.nih.gov/](http://www.niaaa.nih.gov/)), and Academy of Finland (grant numbers: 141054, 263278, 264146, 265240, 308248 and 312073) received by JK. The funders had no role in the study design, data collection and analysis, decision to publish, or preparation of the manuscript.

**Competing interests:** The authors have declared no conflicts of interest.

on a scale from 0 to 63 where lower scores indicate fewer depressive symptoms) than their leaner co-twins. Association analyses, using all twin pairs, confirmed that higher BMI within pairs linked to general health, physical functioning and depressive symptoms. No association was found between BMI and anxiety, self-esteem, life satisfaction, or social well-being.

## Conclusions

In conclusion, this study underscores the notable association between elevated BMI and physical well-being and to a lesser extent between elevated BMI and depressive symptoms, while revealing no discernible connections with anxiety, self-esteem, life satisfaction, or social well-being.

## Introduction

Obesity is recognised as both a precipitant and a consequence of mental health problems [1–3]. On one hand, obesity is associated with stigma and prejudice, which may impair the mental health of persons with obesity [4, 5]. On the other hand, psychological problems may interfere with efforts towards weight control, resulting in the consumption of energy-dense foods and decreased physical activity and subsequently weight gain [6].

Mental health includes several different domains in our emotional, psychological, and social well-being. The most frequently studied domain in the field of obesity is depression. There is good evidence for prospective obesity-to-depression associations, while evidence for depression-to-obesity associations is less consistent [7]. However, not all studies have unequivocally found a positive relationship between obesity and future depression [8]. Fewer data are available on mood disorders other than depression, and most of these studies are cross-sectional. Some previous studies have found positive associations between anxiety and obesity [9–11], while others have not [12].

The life satisfaction, mental health -related quality of life, and self-esteem of adults with obesity compared to normal-weight adults remain less clear. Using the RAND 36-Item Health Survey, it has become evident that physical health -related quality of life is lower in individuals with obesity [13–15], but the findings on mental health -related quality of life are much less consistent [14–16]. As for self-esteem, its associations with Body Mass Index (BMI) in adults are unclear [17, 18].

Given that obesity and mental health are suggested to have shared genetic aetiology [3, 19–24], it would be beneficial to estimate how obesity is associated with psychological well-being without confounding genetic factors. Due to the significant heterogeneity of mental health measurements in previously published studies, it is difficult to obtain a global picture of how obesity and mental health are related. Additionally, because many studies include participants with severe obesity and significant life-impairing co-morbidities, less is known about the effects of less severe obesity in the absence of major comorbidities on mental health.

In this study, we take advantage of a rare set of well-characterised BMI-discordant and -concordant, healthy, young adult twin pairs to examine the associations between mental health and BMI. Monozygotic (MZ) twin pairs discordant for BMI are, despite their differing phenotype, completely matched for genetic variation, age, and sex. Additionally, same-sex dizygotic (DZ) twin pairs who are discordant for BMI share around 50% of their segregating genes but, similarly to the MZ twin pairs, have the same family environment, sex and age. This allows for research of BMI matching for genetic factors fully (in MZ pairs) or partially (in DZ

pairs), as well as full adjustment for familial influences that confound studies comparing groups of unrelated leaner and heavier individuals. The aim of this study is to investigate the associations between an extensive profile of mental health factors (symptoms of depression and anxiety, self-esteem, health-related quality of life, life satisfaction, and social well-being) and BMI.

## Methods

### Participants

This cross-sectional study included 36 healthy MZ twin pairs discordant for BMI (within-pair difference  $\Delta\text{BMI} \geq 3 \text{ kg/m}^2$ ;  $n = 28$  men,  $n = 44$  women, mean age  $28.9 \pm \text{Standard Error (SE)} 0.7$  years) and 46 BMI-discordant DZ twin pairs ( $n = 50$  men,  $n = 42$  women, mean age  $27.4 \pm 0.3$  years). In addition, 38 MZ twin pairs concordant for BMI ( $\Delta\text{BMI} < 3 \text{ kg/m}^2$ ;  $n = 44$  men,  $n = 32$  women, mean age  $29.4 \pm 0.6$  years) and 31 BMI-concordant DZ twin pairs ( $n = 34$  men,  $n = 28$  women, mean age  $28.3 \pm 0.4$  years) were included as reference groups. All twin pairs were same-sex pairs. The BMI discordance cut-off point was determined in earlier studies [25, 26]. The pairs were identified from 2 population-based longitudinal studies of 10 complete Finnish birth cohorts, FinnTwin16 (years 1975–1979,  $n = 2578$  pairs) and FinnTwin12 (years 1983–1987,  $n = 2839$  pairs), with data retrieved between 2003 and 2013 [27]. All participants provided written informed consent. The Ethics Committee of the Helsinki University Central Hospital approved the study.

### Clinical assessments

Weight and height were measured to calculate BMI (weight in kilograms divided by height in meters squared ( $\text{kg/m}^2$ )).

The twins were invited to an independent medical evaluation conducted by a physician. The evaluation included a medical history, physical examination, and laboratory assessments. This aimed to confirm the absence of concomitant diseases and disorders affecting weight or mood (i.e., anaemia, hypo- or hyperthyroidism) and regular medication (except contraceptives). Notably, twins with diagnosed psychiatric disorders, including eating disorders, were excluded.

### Mental health assessments

Depressive symptoms were assessed by the Beck Depression Inventory (BDI) [28]. A BDI score, with a range between 0 (no symptoms of depression) and 63 (severe symptoms of depression), was calculated for each participant using the principles described by Beck et al. [28]. The items on appetite and weight changes were amended to include both an increased appetite and increased weight instead of only decreased appetite and weight. Moreover, to separate intentional weight loss from weight loss as a symptom of depression, an additional item was added to the original 21 items of the BDI to assess any current attempt to lose weight ('I try/don't try to lose weight'). Accordingly, reported weight loss in a person with intentions to lose weight resulted in a score of 0, as opposed to an unintentional weight loss that was scored in the usual manner of the BDI [28]. The Cronbach's alpha is 0.69.

Anxiety was assessed by the State-Trait Anxiety Inventory with separate indices for state and trait anxiety [29]. State anxiety refers to anxiety experienced when some threat is present, such as that induced by answering the inventory, whilst trait anxiety refers to general levels of feelings of anxiety in everyday life. Both a state and trait anxiety score, with a range between 20 (no anxiety) and 80 (high anxiety), were calculated for each participant as described by Julian

et al. [29]. The Cronbach's alpha is 0.89 for state and 0.94 for trait anxiety. Self-esteem was assessed by the Rosenberg Self-Esteem Scale with a summary scale from 0 to 30, where 30 is the best possible self-esteem, scored as in [30]. The Cronbach's alpha is 0.95.

Health-related quality of life was assessed by the RAND 36-Item Health Survey 1.0 questionnaire and its eight internal health concepts (physical functioning, role limitations due to physical health problems, role limitations due to emotional problems, energy, emotional well-being, social functioning, pain, and general health) [31]. Items from the physical and mental concept areas were combined to create physical and mental summary scales. The summary scale for physical health-related quality of life included physical functioning, role limitations due to physical health problems, and pain, whereas the summary scale for mental health-related quality of life included emotional well-being and role limitations due to emotional problems. The rest of the components (energy, social functioning, and general health) covered both physical and mental dimensions and were thus not included in these summary scales. Each concept area and summary scale was scored as in [32]. The Cronbach's alpha is 0.91.

Life satisfaction was assessed with Allardt's four-item scale [33, 34] with items on overall feelings towards life (whether life is interesting, happy, and easy) and loneliness. These items were scored as described in [35] to form a scale from 4–20 (life satisfaction score 4–6 = satisfied, 7–11 = somewhat satisfied, 12–20 = dissatisfied). The Cronbach's alpha is 0.77. Social well-being was assessed with another four items considering relationships with the co-twin, father, mother, and partner. These items were scored as described in [36] to form a satisfaction sum scale from 0 to 8 (ranging from 0 = not at all satisfied to 8 = fully satisfied). The Cronbach's alpha is 0.83.

## Statistical analyses

Statistical analyses were performed with Stata 13.1 (Stata Corporation, College Station, TX, USA) and the R statistical computing environment (R Foundation for Statistical Computing) [37]. The number of twin pairs with answers from both twins to each scale in the questionnaire is shown in S1 Table. We applied non-parametric statistical tests due to the small sample and non-normally distributed variables in some of the measures. Comparisons between leaner and heavier co-twins (based on BMI) in both BMI-discordant and -concordant groups were performed using Wilcoxon signed-rank tests. We set the level of statistical significance to  $P < 0.05$  and provide exact p-values. Furthermore, because multiple testing increases the risk of type 1 errors, we calculated false discovery rate (FDR) adjusted p-values as described in [38].

We used the common language effect size, as described by McGraw in [39], to calculate the size of the within-pair differences. In this study, it indicates the probability that any given heavier co-twin of the particular pair in question scores higher on a mental health variable than the leaner co-twin. For example, in BMI-discordant MZ twin pairs, a common language effect size of 0.75 for depressive symptoms means a 75% chance that the heavier co-twin has greater depressive symptoms in any randomly chosen BMI-discordant MZ twin pair. Note that an effect size of 0.50 indicates that the leaner and heavier co-twins are equally likely to score higher on this particular mental health trait.

## Association analyses

Taking advantage of the twin design, we also examined the relationship between the heavier or leaner status of the co-twins with the outcome measures (only BMI-discordant pairs in both zygositys). We then investigated the relationship of the co-twins' BMI difference as a continuous measure with the differences in outcome measures (all twin pairs in both zygositys). Both

the above models utilized a linear mixed-model (R package *lmer* [40]) with clustering for family. Benjamini-Hochberg FDR corrected  $P < 0.05$  was considered significant.

Next, we tested to see whether the zygosity of the twin pairs influenced our results from the analysis outlined above. We used a linear mixed-model to test whether the within-twin relationship between BMI and the outcome measures differed between MZ and DZ twins. Benjamini-Hochberg FDR corrected  $P < 0.05$  was considered significant. In all association analyses, we used both the outcome measures as is and also scaled them to obtain z-values (standardized  $\beta$ ) so that the results allowed us to directly compare the strength of relationships across all measures.

## Results

### Participant characteristics

The weight and height characteristics of the twins are summarised in Table 1. The heavier co-twins of the BMI-discordant MZ pairs weighed on average 17.9 kg (SE 1.3) more and had 5.9 kg/m<sup>2</sup> (SE 0.4) higher BMI than their leaner twin-pair members. Similar intra-pair differences ( $\Delta$ ) in weight (22.6 kg, SE 1.8) and BMI (7.2 kg/m<sup>2</sup>, SE 0.5) were observed in the BMI-discordant DZ pairs.

### Depression, anxiety, and self-esteem

We first assessed whether there were any differences in depressive symptoms (BDI) within the BMI-discordant twin pairs. We observed that the heavier co-twins of the BMI-discordant DZ twin pairs scored higher (4.3, SE 0.9) on the BDI questionnaire, indicating more depressive symptoms, than the leaner co-twins (2.4, SE 0.5; nominal  $P = 0.016$ , FDR = 0.345), and a similar tendency was observed within the BMI-discordant MZ twin pairs ( $P = 0.071$ , FDR = 0.166) (Fig 1 and Table 2). The common language effect size demonstrates that the probability of the heavier co-twins scoring higher on this questionnaire is 67% in MZ and 70% in DZ twin pairs. The BDI scores of the BMI-concordant co-twins were comparable (S2 Table).

### Quality of life, life satisfaction, and social well-being

When examining both physical and mental dimensions of health-related quality of life (RAND 36-Item Health Survey 1.0), we observed the following differences between the twin pairs: Heavier co-twins of BMI-discordant MZ twin pairs had worse physical functioning ( $P = 0.024$ , FDR = 0.122), felt less energetic ( $P = 0.013$ , FDR = 0.109), and reported lower emotional well-being ( $P = 0.031$ , FDR = 0.122) and general health ( $P = 0.001$ , FDR = 0.017) than their leaner co-twins (Fig 2). In BMI-discordant DZ (Table 2) and BMI-concordant MZ twin pairs (S2 Table), the overall physical well-being of the heavier group was worse than that of the

**Table 1. Basic characteristics of the leaner and heavier twin-pairs.**

|                          | MZ discordant (n = 72) |             | DZ discordant (n = 92) |             | MZ concordant (n = 76) |             | DZ concordant (n = 62) |             |
|--------------------------|------------------------|-------------|------------------------|-------------|------------------------|-------------|------------------------|-------------|
|                          | Leaner                 | Heavier     | Leaner                 | Heavier     | Leaner                 | Heavier     | Leaner                 | Heavier     |
| Age (y)                  | 28.9 (0.8)             |             | 27.4 (0.3)             |             | 29.4 (0.6)             |             | 28.3 (0.4)             |             |
| Height (cm)              | 172.0 (1.8)            | 172.4 (1.7) | 173.3 (1.2)            | 174.8 (1.3) | 173.0 (1.5)            | 173.2 (1.5) | 173.4 (1.7)            | 171.8 (1.5) |
| Weight (kg)              | 76.2 (2.9)             | 94.1 (3.2)  | 65.0 (1.4)             | 87.6 (1.9)  | 73.4 (2.1)             | 77.2 (2.1)  | 71.0 (2.6)             | 74.6 (2.7)  |
| BMI (kg/m <sup>2</sup> ) | 25.5 (0.8)             | 31.4 (0.9)  | 21.5 (0.4)             | 28.7 (0.6)  | 24.4 (0.5)             | 25.6 (0.5)  | 23.5 (0.6)             | 25.2 (0.7)  |

Data are presented as mean (standard error). MZ = monozygotic, DZ = dizygotic, BMI = body mass index, n = number of pairs.

The height differences between heavier and leaner twins were not significant in any type of pair, while weight and BMI differences were highly significant (all  $P < 0.002$ ).

<https://doi.org/10.1371/journal.pone.0294162.t001>

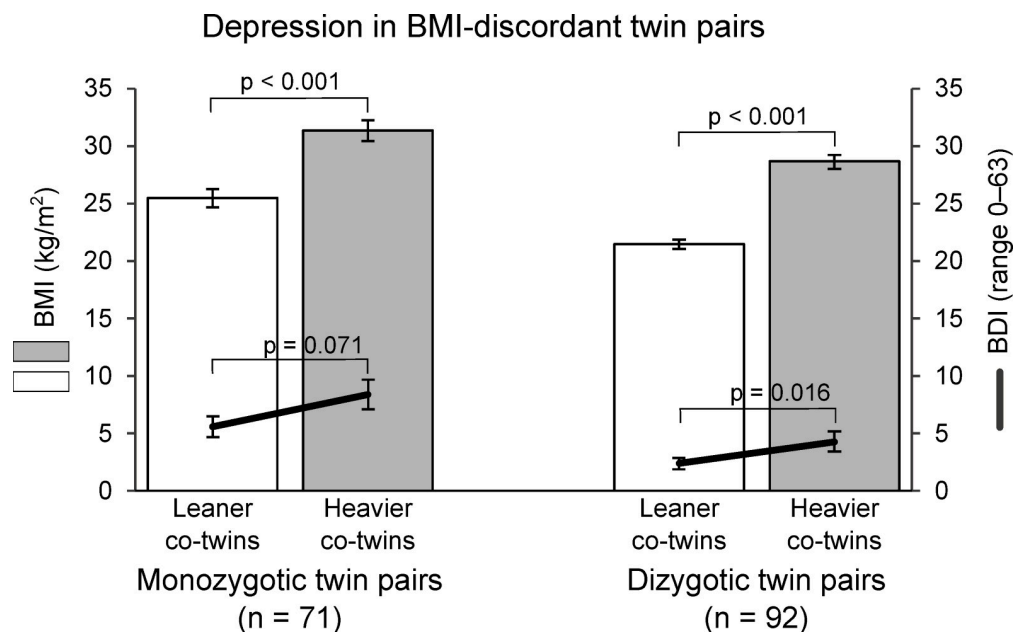

**Fig 1. Mean Beck Depression Inventory (BDI) score in twin pairs discordant for Body Mass Index (BMI).** The higher the BDI score, the more depressive symptoms.

<https://doi.org/10.1371/journal.pone.0294162.g001>

corresponding leaner group. We observed no statistically significant differences within BMI-concordant DZ twin pairs. No groups had statistically significant co-twin differences in role limitations, social functioning, pain, or total mental well-being.

Lastly, we analysed life satisfaction and social well-being. Both BMI-discordant and -concordant MZ and DZ co-twins were comparably satisfied with their lives and family relationships (Table 2).

### Association analyses

We examined the relationship between the heavier or leaner status of the co-twins (BMI-discordant pairs, both zygosity) or within-pair difference in BMI as a continuous measure (all twin pairs) with the outcome measures (S3 Table). We found that the heavier co-twins had significantly lower scores for both physical function and general health. Using within-pair difference in BMI, rather than the heavy/lean status, we confirmed that physical function followed by general health had the strongest significant relationships with higher BMI within the co-twins. While both these measures were associated negatively with higher BMI, we also found a positive but weaker relationship between BDI score and higher BMI in the co-twins. Because co-twins are perfectly matched for age and sex, our results are free from these confounders. Additionally, we did not find any significant differences between MZ and DZ pairs when analysing the relationship of BMI to outcome measures.

### Discussion

In the current study, we analysed a wide range of psychological and quality of life questionnaire responses to obtain a global picture of how obesity is associated with mental well-being and mental health. We took advantage of a unique twin design, namely BMI-discordant MZ and DZ twin pairs, which allows for examining the relationships between excess body weight and mental health in leaner and heavier groups sharing the same (family) environment and



Table 2. Mental well-being in leaner and heavier co-twins of monozygotic (MZ) and dizygotic (DZ) BMI-discordant pairs.

|                                                   | MZ BMI-discordant<br>(n = 72) |            |       |       |      |            | DZ BMI-discordant<br>(n = 92) |       |       |      |
|---------------------------------------------------|-------------------------------|------------|-------|-------|------|------------|-------------------------------|-------|-------|------|
|                                                   | Leaner                        | Heavier    | P     | FDR   | %H>L | Leaner     | Heavier                       | P     | FDR   | %H>L |
| <b>Beck Depression Inventory<sup>1</sup></b>      |                               |            |       |       |      |            |                               |       |       |      |
| Total score                                       | 5.6 (0.9)                     | 8.4 (1.3)  | 0.071 | 0.166 | 67   | 2.4 (0.5)  | 4.3 (0.9)                     | 0.016 | 0.345 | 70   |
| <b>State-Trait Anxiety Inventory<sup>2</sup></b>  |                               |            |       |       |      |            |                               |       |       |      |
| State anxiety score                               | 34.9 (1.4)                    | 35.9 (1.6) | 0.590 | 0.725 | 55   | 32.1 (1.0) | 31.8 (1.0)                    | 0.590 | 1.000 | 45   |
| Trait anxiety score                               | 34.9 (1.4)                    | 37.0 (1.4) | 0.130 | 0.234 | 64   | 33.4 (1.0) | 33.3 (1.2)                    | 0.960 | 1.000 | 50   |
| <b>Rosenberg Self-Esteem Scale<sup>3</sup></b>    |                               |            |       |       |      |            |                               |       |       |      |
| Total score                                       | 23.1 (1.0)                    | 22.0 (1.0) | 0.590 | 0.725 | 45   | 25.1 (0.8) | 24.7 (0.9)                    | 0.900 | 1.000 | 51   |
| <b>RAND 36-Item Health Survey 1.0<sup>4</sup></b> |                               |            |       |       |      |            |                               |       |       |      |
| Physical functioning                              | 95.5 (1.1)                    | 90.3 (2.2) | 0.024 | 0.122 | 27   | 99.0 (0.5) | 96.0 (1.6)                    | 0.130 | 0.835 | 38   |
| Role limitations due to physical health           | 83.6 (5.6)                    | 83.6 (6.0) | 0.820 | 0.866 | 48   | 96.5 (2.0) | 95.1 (2.4)                    | 0.650 | 1.000 | 47   |
| Role limitations due to emotional problems        | 78.2 (6.9)                    | 75.9 (7.0) | 0.900 | 0.866 | 49   | 96.3 (2.2) | 90.7 (4.3)                    | 0.440 | 1.000 | 45   |
| Energy level                                      | 66.6 (3.3)                    | 55.6 (3.4) | 0.013 | 0.109 | 24   | 64.2 (2.7) | 70.0 (3.0)                    | 0.170 | 0.909 | 63   |
| Emotional well-being                              | 75.4 (2.9)                    | 65.9 (3.2) | 0.031 | 0.122 | 27   | 80.2 (2.0) | 78.9 (2.3)                    | 0.750 | 1.000 | 47   |
| Social functioning                                | 84.5 (4.0)                    | 84.5 (3.8) | 0.950 | 0.866 | 49   | 92.7 (2.0) | 94.4 (2.7)                    | 0.270 | 1.000 | 59   |
| Pain                                              | 79.5 (3.8)                    | 78.1 (4.1) | 0.610 | 0.725 | 45   | 91.2 (1.5) | 83.6 (3.4)                    | 0.096 | 0.812 | 34   |
| General health                                    | 72.4 (3.3)                    | 58.8 (3.0) | 0.001 | 0.017 | 17   | 78.9 (2.4) | 75.3 (2.8)                    | 0.260 | 1.000 | 39   |
| Total physical well-being score                   | 86.2 (2.8)                    | 84.0 (3.4) | 0.270 | 0.409 | 38   | 95.6 (1.0) | 91.6 (1.9)                    | 0.035 | 0.356 | 30   |
| Total mental well-being score                     | 76.8 (4.4)                    | 70.9 (4.7) | 0.210 | 0.356 | 37   | 88.7 (1.7) | 84.7 (2.9)                    | 0.390 | 1.000 | 42   |
| <b>Life satisfaction<sup>5</sup></b>              |                               |            |       |       |      |            |                               |       |       |      |
| Life satisfaction score                           | 8.2 (0.5)                     | 9.3 (0.5)  | 0.059 | 0.165 | 67   | 7.6 (0.3)  | 7.2 (0.3)                     | 0.300 | 1.000 | 40   |
| <b>Relationship satisfaction<sup>6</sup></b>      |                               |            |       |       |      |            |                               |       |       |      |
| Relationship satisfaction score                   | 3.9 (0.4)                     | 3.7 (0.4)  | 0.290 | 0.409 | 40   | 3.7 (0.4)  | 3.9 (0.4)                     | 0.920 | 1.000 | 49   |

Data are presented as mean (standard error). BMI = Body Mass Index. FDR = false discovery rate adjusted *P*-values. %H>L = probability on a scale of 0–100% that the heavier (H) co-twins score higher on a trait than the leaner (L) co-twins.

<sup>1</sup> On a scale from 0 to 63, higher scores indicate more severe depressive symptoms.

<sup>2</sup> On a scale from 20 to 80, higher scores indicate a higher degree of anxiety.

<sup>3</sup> On a scale from 0 to 30, higher scores indicate higher self-esteem.

<sup>4</sup> On a scale from 0 to 100, higher scores indicate higher quality of life.

<sup>5</sup> On a scale from 4 to 20, higher scores indicate a higher level of dissatisfaction with life (score 4–6 = satisfied, 7–11 = intermediately satisfied, 12–20 = dissatisfied).

<sup>6</sup> On a scale from 0 to 8, higher scores indicate a higher level of satisfaction with family relationships (mother, father, co-twin, partner; score 0 = from not at all to only somewhat satisfied, 8 = fully satisfied).

Leaner and heavier co-twins did not differ with respect to either anxiety or self-esteem in any of the twin groups.

<https://doi.org/10.1371/journal.pone.0294162.t002>

matching either fully (MZ) or partially (DZ) for genetic factors. Twin pairs are also, by definition, matched for age, and in our study including only same-sex pairs are also matched for sex.

Our results show that heavier MZ co-twins from BMI-discordant pairs had poorer general health, physical functioning, energy levels, and emotional well-being, as well as a tendency for more depressive symptoms compared to their leaner co-twins. Association analyses, using all twin pairs, confirmed that higher BMI within pairs linked to general health, physical functioning, and depressive symptoms. However, we observed no significant associations between BMI and anxiety, self-esteem, life satisfaction, or social well-being.

We observed small differences in physical functioning between co-twins, consistently in the direction that might indicate a preliminary physical deterioration in an early stage of mild forms of overweight and obesity. This supports the findings of several previous studies which have reported that obesity is related to lower physical health-related quality of life [13–15].

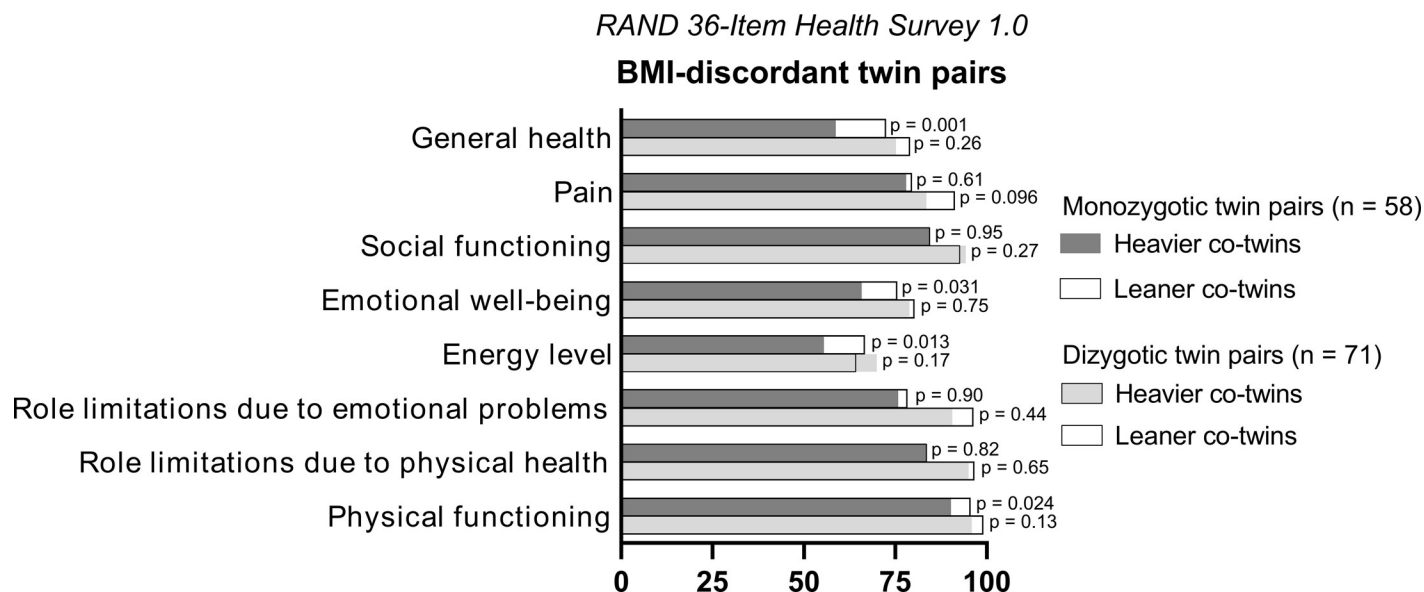

**Fig 2. Dimensions of health-related quality of life (RAND 36-Item Health Survey 1.0) in twin pairs discordant for body mass index (BMI).** Scores are presented as means. On a scale from 0 to 100, higher scores indicate higher quality of life.

<https://doi.org/10.1371/journal.pone.0294162.g002>

Although the heavier co-twins of the BMI-discordant MZ twin pairs reported lower emotional well-being in the RAND 36-Item Health Survey 1.0, there were no statistically significant associations between BMI and the total mental well-being score. Similar results were found in studies by Ford et al. [13] with over 100,000 survey participants as well as Korhonen et al. [41] with almost 1200 healthy Finnish adults, where higher BMI was strongly associated with worse physical functioning but not with worse mental well-being.

The twin pairs had no or minimal symptoms of clinical depression. However, there was a trend towards higher BDI scores with higher BMI. This association between obesity and depression has been observed in several previous studies [12, 42, 43]. One possible explanation could be weight-related stigma. A person's perceived self-value may decrease when internalizing negative attitudes and stereotypes related to higher body weight. Internalized weight stigma, and even just perceiving oneself as having overweight or obesity, has been shown to lead to both worse psychological well-being and lower self-esteem [44, 45], which in turn are risk factors for depression [46].

We observed no clinically meaningful differences between any of the co-twins in state, trait, or total anxiety measured by the State-Trait Anxiety Inventory. In an extensive survey of more than 62,000 participants by Scott et al. [10], anxiety was more prevalent in individuals with BMI > 35 kg/m<sup>2</sup> (odds ratio 1.5). On the contrary, a later study of more than 120,000 participants by Bjørngaard et al. [43] suggested that general anxiety and obesity are not associated. Our study supports this latter finding.

We observed no association between BMI and self-esteem through the Rosenberg Self-Esteem Scale, similar to a study by Pearl et al. [18] on 240 individuals with obesity and binge eating disorder. On the contrary, a meta-analysis of 46 studies by Sikorski et al. [47] supports the general view that adults with obesity have lower self-esteem. As with all aspects of mental health, reduced self-esteem may also depend on the severity of obesity. In this study, the heavier twins in discordant DZ pairs had on average overweight (BMI 25–30) or, for MZ pairs, class I obesity (BMI 30–35). Additionally, the causal nature and direction of the association needs to be resolved.



All participants were comparably satisfied with their lives and family relationships, measured by Allardt's four-item scale. Little is known about the associations between life satisfaction and obesity. Still, a cross-sectional study by Ul-Haq et al. [48] featuring over 16,000 participants suggests that men are more likely than women to report happiness when overweight or with slight obesity. Additionally, they found a significant negative correlation between obesity and happiness, which did not remain after the results were adjusted for self-reported health, suggesting that health rather than BMI mediated the association.

The current study has several strengths but also some limitations. Due to the extreme rarity of BMI-discordant MZ twin pairs, despite a comprehensive screening from two large nationwide twin populations, the number of twin pairs studied is quite low. This may especially lead to type 2 statistical errors (inability to find true positive associations) and a slightly increased risk for type 1 errors (false positives). Additionally, this study is cross-sectional and, therefore does not allow for definitive conclusions about causality. However, using BMI-discordant twin pairs enabled full control for sex, age, and family background between the leaner and heavier groups. We also matched the genotypic factors between the co-twins, fully in MZ and partially in DZ pairs. This design minimises the confounding of genetic factors and shared exposures and experiences with the observations. This is a major advantage for conclusions regarding such multifactorial traits as obesity and mental health.

In the future, prospective studies with larger cohorts and measured genotypes would better illuminate the associations between obesity and mental health factors. Given that acquired obesity is associated with poorer mental well-being, conducting mental health intervention studies targeting physical well-being would also be beneficial.

## Conclusions

Heavier MZ co-twins from BMI-discordant pairs had poorer general health, physical functioning, energy levels, and emotional well-being, as well as a tendency for more depressive symptoms compared to their leaner co-twins.

Association analyses, using all twin pairs, confirmed that higher BMI within pairs linked to general health, physical functioning, and depressive symptoms. No association was found between BMI and anxiety, self-esteem, life satisfaction, or social well-being.

## Supporting information

**S1 Table. Number of twin pairs with data available for each questionnaire.**  
(PDF)

**S2 Table. Mental well-being in leaner and heavier co-twins of monozygotic (MZ) and dizygotic (DZ) BMI-concordant pairs.**  
(PDF)

**S3 Table. Relationship of heavier-leaner status or BMI to outcome measures between co-twins.**  
(PDF)

## Author Contributions

**Conceptualization:** Sakris K. E. Kupila.

**Data curation:** Sakris K. E. Kupila, Jaakko Kaprio, Aila Rissanen, Kirsi H. Pietiläinen.

**Formal analysis:** Sakris K. E. Kupila, Bram J. Berntzen, Maheswary Muniandy.

**Funding acquisition:** Jaakko Kaprio, Aila Rissanen, Kirsi H. Pietiläinen.

**Methodology:** Sakris K. E. Kupila, Bram J. Berntzen, Maheswary Muniandy.

**Project administration:** Sakris K. E. Kupila.

**Supervision:** Aila J. Ahola, Jaakko Kaprio, Kirsi H. Pietiläinen.

**Visualization:** Sakris K. E. Kupila, Bram J. Berntzen.

**Writing – original draft:** Sakris K. E. Kupila.

**Writing – review & editing:** Bram J. Berntzen, Maheswary Muniandy, Aila J. Ahola, Jaakko Kaprio, Aila Rissanen, Kirsi H. Pietiläinen.

## References

1. Abiri B, Hosseini F, Banihashem S, Madinehzad SA, Valizadeh M. Mental health and quality of life in different obesity phenotypes: a systematic review. *Health Qual Life Outcomes*. 2022 Apr 19; 20:63. <https://doi.org/10.1186/s12955-022-01974-2> PMID: 35439997
2. Melamed OC, Selby P, Taylor VH. Mental Health and Obesity During the COVID-19 Pandemic. *Curr Obes Rep*. 2022 Mar 1; 11(1):23–31. <https://doi.org/10.1007/s13679-021-00466-6> PMID: 35254633
3. Avila C, Holloway AC, Hahn MK, Morrison KM, Restivo M, Anglin R, et al. An Overview of Links Between Obesity and Mental Health. *Curr Obes Rep*. 2015 Sep 1; 4(3):303–10. <https://doi.org/10.1007/s13679-015-0164-9> PMID: 26627487
4. Puhl RM, Heuer CA. Obesity Stigma: Important Considerations for Public Health. *Am J Public Health*. 2010 Jun; 100(6):1019–28. <https://doi.org/10.2105/AJPH.2009.159491> PMID: 20075322
5. Phelan SM, Burgess DJ, Yeazel MW, Hellerstedt WL, Griffin JM, van Ryn M. Impact of weight bias and stigma on quality of care and outcomes for patients with obesity. *Obesity Reviews*. 2015; 16(4):319–26. <https://doi.org/10.1111/obr.12266> PMID: 25752756
6. Jung FUCE, Luck-Sikorski C, Wiemers N, Riedel-Heller SG. Dietitians and Nutritionists: Stigma in the Context of Obesity. A Systematic Review. *PLoS One* [Internet]. 2015 Oct 14 [cited 2019 Jun 25]; 10(10). Available from: <https://www.ncbi.nlm.nih.gov/pmc/articles/PMC4605484/> <https://doi.org/10.1371/journal.pone.0140276> PMID: 26466329
7. Faith MS, Butryn M, Wadden TA, Fabricatore A, Nguyen AM, Heymsfield SB. Evidence for prospective associations among depression and obesity in population-based studies. *Obes Rev*. 2011; 12(5):438. <https://doi.org/10.1111/j.1467-789X.2010.00843.x> PMID: 21414128
8. Gariepy G, Wang J, Lesage AD, Schmitz N. The longitudinal association from obesity to depression: results from the 12-year National Population Health Survey. *Obesity (Silver Spring)*. 2010; 18(5):1033–8. <https://doi.org/10.1038/oby.2009.333> PMID: 19816409
9. Petry NM, Barry D, Pietrzak RH, Wagner JA. Overweight and obesity are associated with psychiatric disorders: results from the National Epidemiologic Survey on Alcohol and Related Conditions. *Psychosom Med*. 2008; 70(3):288–97. <https://doi.org/10.1097/PSY.0b013e3181651651> PMID: 18378873
10. Scott KM, McGee MA, Wells JE, Oakley Browne MA. Obesity and mental disorders in the adult general population. *Journal of Psychosomatic Research*. 2008 Jan; 64(1):97–105. <https://doi.org/10.1016/j.jpsychores.2007.09.006> PMID: 18158005
11. Gariepy G, Nitka D, Schmitz N. The association between obesity and anxiety disorders in the population: a systematic review and meta-analysis. *International Journal of Obesity*. 2010 Mar; 34(3):407–19. <https://doi.org/10.1038/ijo.2009.252> PMID: 19997072
12. Atlantis E, Baker M. Obesity effects on depression: systematic review of epidemiological studies. *IntJObes(Lond)*. 2008; 32(6):881–91. <https://doi.org/10.1038/ijo.2008.54> PMID: 18414420
13. Ford ES, Moriarty DG, Zack MM, Mokdad AH, Chapman DP. Self-reported body mass index and health-related quality of life: findings from the Behavioral Risk Factor Surveillance System. *ObesRes*. 2001; 9(1):21–31. <https://doi.org/10.1038/oby.2001.4> PMID: 11346664
14. Ul-Haq Z, Mackay DF, Fenwick E, Pell JP. Meta-analysis of the association between body mass index and health-related quality of life among adults, assessed by the SF-36. *Obesity (Silver Spring)*. 2013; 21(3):322. <https://doi.org/10.1002/oby.20107> PMID: 23592685
15. Huang IC, Frangakis C, Wu AW. The relationship of excess body weight and health-related quality of life: evidence from a population study in Taiwan. *IntJObes(Lond)*. 2006; 30(8):1250–9. <https://doi.org/10.1038/sj.ijo.0803250> PMID: 16520814
16. Magallares A, Benito de Valle P, Irlas JA, Bolanos-Rios P, Jauregui-Lobera I. Psychological well-being in a sample of obese patients compared with a control group. *NutrHosp*. 2014; 30(1):32–6.

17. Abiles V, Rodriguez-Ruiz S, Abiles J, Mellado C, Garcia A, Perez de la Cruz A, et al. Psychological characteristics of morbidly obese candidates for bariatric surgery. *ObesSurg*. 2010; 20(2):161–7. <https://doi.org/10.1007/s11695-008-9726-1> PMID: 18958537
18. Pearl RL, White MA, Grilo CM. Overvaluation of shape and weight as a mediator between self-esteem and weight bias internalization among patients with binge eating disorder. *EatBehav*. 2014; 15(2):259–61. <https://doi.org/10.1016/j.eatbeh.2014.03.005> PMID: 24854815
19. Tyrrell J, Mulugeta A, Wood AR, Zhou A, Beaumont RN, Tuke MA, et al. Using genetics to understand the causal influence of higher BMI on depression. *Int J Epidemiol*. 2019 01; 48(3):834–48. <https://doi.org/10.1093/ije/dyy223> PMID: 30423117
20. Raevuori A, Dick DM, Keski-Rahkonen A, Pulkkinen L, Rose RJ, Rissanen A, et al. Genetic and environmental factors affecting self-esteem from age 14 to 17: a longitudinal study of Finnish twins. *Psychol Med*. 2007 Nov; 37(11):1625–33. <https://doi.org/10.1017/S0033291707000840> PMID: 17537282
21. Jokela M, Berg V, Silventoinen K, Batty GD, Singh-Manoux A, Kaprio J, et al. Body Mass Index and Depressive Symptoms: Testing for Adverse and Protective Associations in Two Twin Cohort Studies. *Twin Research and Human Genetics*. 2016 Aug; 19(04):306–11. <https://doi.org/10.1017/thg.2016.14> PMID: 27055784
22. Afari N, Noonan C, Goldberg J, Roy-Byrne P, Schur E, Golnari G, et al. Depression and obesity: do shared genes explain the relationship? *Depression and Anxiety*. 2010 Sep; 27(9):799–806. <https://doi.org/10.1002/da.20704> PMID: 20821799
23. Schur E, Godfrey KM, Dansie E, Buchwald D, Pagoto S, Afari N. Can familial factors account for the association of body mass index with poor mental health in men or women? *Gen Hosp Psychiatry*. 2013 Oct; 35(5):502–7. <https://doi.org/10.1016/j.genhosppsych.2013.04.004> PMID: 23664570
24. Martin J, Taylor MJ, Lichtenstein P. Assessing the evidence for shared genetic risks across psychiatric disorders and traits. *Psychol Med*. 2018 Aug; 48(11):1759–74. <https://doi.org/10.1017/S0033291717003440> PMID: 29198204
25. Hakala P, Rissanen A, Koskenvuo M, Kaprio J, Rönnemaa T. Environmental factors in the development of obesity in identical twins. *Int J Obes Relat Metab Disord*. 1999 Jul; 23(7):746–53. <https://doi.org/10.1038/sj.ijo.0800923> PMID: 10454109
26. Rönnemaa T, Koskenvuo M, Marniemi J, Koivunen T, Sajantila A, Rissanen A, et al. Glucose metabolism in identical twins discordant for obesity. The critical role of visceral fat. *J Clin Endocrinol Metab*. 1997 Feb; 82(2):383–7. <https://doi.org/10.1210/jcem.82.2.3763> PMID: 9024223
27. Kaprio J. The Finnish Twin Cohort Study: an update. *Twin Res Hum Genet*. 2013 Feb; 16(1):157–62. <https://doi.org/10.1017/thg.2012.142> PMID: 23298696
28. Beck AT, Steer RA, Brown GK. Manual for the Beck Depression Inventory-II. San Antonio, TX: Psychological Corporation; 1996.
29. Julian LJ. Measures of anxiety: State-Trait Anxiety Inventory (STAI), Beck Anxiety Inventory (BAI), and Hospital Anxiety and Depression Scale-Anxiety (HADS-A). *Arthritis Care Res*. 2011; 63(S11):S472.
30. Rosenberg M. Society and the adolescent self-image. Princeton, NJ: Princeton University Press; 1965. 326 p.
31. Hays RD, Morales LS. The RAND-36 Measure of Health-Related Quality of Life [Internet]. 2001. Available from: [https://www.researchgate.net/publication/11852513\\_The\\_RAND-36\\_Measure\\_of\\_Health-Related\\_Quality\\_of\\_Life](https://www.researchgate.net/publication/11852513_The_RAND-36_Measure_of_Health-Related_Quality_of_Life)
32. Monica 1776 Main Street Santa, 90401–3208 C. 36-Item Short Form Survey (SF-36) Scoring Instructions | RAND [Internet]. Available from: [https://www.rand.org/health/surveys\\_tools/mos/36-item-short-form/scoring.html](https://www.rand.org/health/surveys_tools/mos/36-item-short-form/scoring.html)
33. Allardt Erik (University of Helsinki), University of Helsinki. Research Group for Comparative Sociology. Scandinavian Welfare Survey 1972 [Internet]. 1972. Available from: <https://services.fsd.uta.fi/catalogue/FSD1017/PIP/quF1017.pdf>
34. Allardt E. Dimensions of Welfare in a Comparative Scandinavian Study. *Acta Sociologica*. 1976; 19(3):227–39.
35. Koivumaa-Honkanen H, Honkanen R, Koskenvuo M, Viinamäki H, Kaprio J. Life dissatisfaction as a predictor of fatal injury in a 20-year follow-up. *Acta Psychiatr Scand*. 2002 Jun; 105(6):444–50. <https://doi.org/10.1034/j.1600-0447.2002.01287.x> PMID: 12059849
36. Narusk A, Pulkkinen L. Parental relationship and adolescents' conceptions of their interaction with significant others. *Eur J Psychol Educ*. 1994 Sep 1; 9(3):203.
37. R Core Team. R: A language and environment for statistical computing [Internet]. R Foundation for Statistical Computing, Vienna, Austria; 2016. Available from: <https://www.R-project.org/>
38. Benjamini Y, Hochberg Y. Controlling the False Discovery Rate: A Practical and Powerful Approach to Multiple Testing. *Journal of the Royal Statistical Society: Series B (Methodological)*. 1995; 57(1):289–300.

39. McGraw KO, Wong SP. A common language effect size statistic. *Psychological Bulletin*. 1992; 111(2):361–5.
40. lmerTest package - RDocumentation [Internet]. [cited 2023 Aug 23]. Available from: <https://www.rdocumentation.org/packages/lmerTest/versions/3.1-3>
41. Korhonen P, Seppälä T, Järvenpää S, Kautiainen H. Body mass index and health-related quality of life in apparently healthy individuals. *Qual Life Res*. 2014; 23(1):67–74. <https://doi.org/10.1007/s11136-013-0433-6> PMID: 23686578
42. Luppino FS, de Wit LM, Bouvy PF, Stijnen T, Cuijpers P, Penninx BWJH, et al. Overweight, Obesity, and Depression: A Systematic Review and Meta-analysis of Longitudinal Studies. *Archives of General Psychiatry*. 2010 Mar 1; 67(3):220. <https://doi.org/10.1001/archgenpsychiatry.2010.2> PMID: 20194822
43. Bjørngaard JH, Carslake D, Lund Nilsen TI, Linthorst AC, Davey Smith G, Gunnell D, et al. Association of Body Mass Index with Depression, Anxiety and Suicide-An Instrumental Variable Analysis of the HUNT Study. *PLoS One*. 2015; 10(7):e0131708. <https://doi.org/10.1371/journal.pone.0131708> PMID: 26167892
44. Robinson E, Haynes A, Sutin A, Daly M. Self-perception of overweight and obesity: A review of mental and physical health outcomes. *Obesity Science & Practice*. 2020; 6(5):552–61. <https://doi.org/10.1002/osp4.424> PMID: 33082997
45. Haynes A, Kersbergen I, Sutin A, Daly M, Robinson E. Does perceived overweight increase risk of depressive symptoms and suicidality beyond objective weight status? A systematic review and meta-analysis. *Clin Psychol Rev*. 2019 Nov; 73:101753. <https://doi.org/10.1016/j.cpr.2019.101753> PMID: 31715442
46. Buckman JEJ, Underwood A, Clarke K, Saunders R, Hollon SD, Fearon P, et al. Risk factors for relapse and recurrence of depression in adults and how they operate: A four-phase systematic review and meta-synthesis. *Clinical Psychology Review*. 2018 Aug 1; 64:13–38. <https://doi.org/10.1016/j.cpr.2018.07.005> PMID: 30075313
47. Sikorski C, Luppá M, Luck T, Riedel-Heller SG. Weight stigma “gets under the skin”—evidence for an adapted psychological mediation framework—a systematic review: A Framework for Internalized Weight Stigma. *Obesity*. 2015 Feb; 23(2):266–76.
48. Ul-Haq Z, Mackay DF, Martin D, Smith DJ, Gill JM, Nicholl BI, et al. Heaviness, health and happiness: a cross-sectional study of 163066 UK Biobank participants. *JEpidemiolCommunity Health*. 2014; 68(4):340–8. <https://doi.org/10.1136/jech-2013-203077> PMID: 24336235
